# Supplementary material for: Polymorphisms in ERCC2 and ERCC5 and Risk of Prostate Cancer: A Meta-Analysis and Systematic Review
Source: PubMed Central journal article supplement — J Cancer. 2018 Jul 16;9(16):2786–94. doi: 10.7150/jca.25356 (PMC6096373; doi:10.7150/jca.25356), 2018-07-16
Supplement: jcav09p2786s1.pdf [file jcav09p2786s1.pdf]

**Polymorphisms in ERCC2 and ERCC5 and Risk of Prostate Cancer:  
A Meta-Analysis and Systematic Review**

Yi Liu<sup>1,2#</sup>, Yonghui Hu<sup>3#</sup>, Meng Zhang<sup>1,2</sup>, Runze Jiang<sup>4\*</sup>, Chaozhao Liang<sup>1,2\*</sup>

<sup>1</sup>Department of Urology, The First Affiliated Hospital of Anhui Medical University, Hefei, China

<sup>2</sup>Institute of Urology, Anhui Medical University, Hefei, China

<sup>3</sup>Department of Endocrinology, The Second Hospital of Tianjin Medical University, Tianjin, China

<sup>4</sup>Department of Genetic Center, Jiangmen Maternity and Child Health Care Hospital

**\*Corresponding authors:**

Chaozhao Liang: [liang\\_chaozhao@ahmu.edu.cn](mailto:liang_chaozhao@ahmu.edu.cn) (Department of Urology, The First Affiliated Hospital of Anhui Medical University, Hefei, China. Department of Urology, The First Affiliated Hospital of Anhui Medical University, Hefei, China);

Runze Jiang: [solon.jiang@gmail.com](mailto:solon.jiang@gmail.com) (Department of Genetic Center, Jiangmen Maternity and Child Health Care Hospital)

<sup>#</sup>These authors contributed equally to the work.

## **Supplementary Information**

**Table S 1.** Methodological quality of the included studies according to the Newcastle-Ottawa Scale

**Table S 2.** Details of the sensitivity analyses for the polymorphisms in ERCC2 and ERCC5 and PCa risk.

**Table S 3.** P values of the Egger's test for the polymorphisms in ERCCs.

**Table S 4.** Details of LD analysis for polymorphisms in ERCC2.

**Figure S 1.** Flow chart of studies selection process for polymorphisms in ERCC2-rs1799793genes.

**Figure S 2.** Flow chart of studies selection process for polymorphisms in ERCC2-rs238406genes.

**Figure S 3.** Flow chart of studies selection process for polymorphisms in ERCC2-rs13181genes.

**Figure S 4.** Flow chart of studies selection process for polymorphisms in ERCC5-rs17655genes.

**Figure S 5.** Forest plots of the association between ERCC2-rs13181 polymorphism and the risk of prostate cancer (B vs. A).

Each square indicates a study, and the area of squares is proportional to the weight of the study. The diamond represents the summary OR and 95% CI. CI= confidence interval, OR= odds ratio.

**Figure S 6.** Forest plots of the association between ERCC2-rs238406 polymorphism and the risk of prostate cancer (B vs. A). Each square indicates a study, and the area of squares is proportional to the weight of the study. The diamond represents the summary OR and 95% CI. CI= confidence interval, OR= odds ratio.

**Figure S 7.** Sensitivity analysis for ERCC2-rs1799793 polymorphism and the risk of prostate cancer (allelic comparison B vs. A).

**Figure S 8.** Sensitivity analysis for ERCC2-rs13181 polymorphism and the risk of prostate cancer (allelic comparison B vs. A).

**Figure S 9.** Sensitivity analysis for ERCC5-rs17655 polymorphism and the risk of prostate cancer (allelic comparison B vs. A).

**Figure S 10.** Sensitivity analysis for ERCC2 rs238406 polymorphism and the risk of prostate cancer (allelic comparison B vs. A).

**Figure S 11.** Begg's funnel plot for publication bias under ERCC2-rs1799793 polymorphism (allelic comparison B vs. A). The x-axis log (OR) and the y-axis is natural logarithm of OR. The horizontal line in the figure represents the overall

estimated log (OR). The two diagonal lines indicate the pseudo 95% confidence limits of the effect estimate. Log (OR) = log-transformed OR, OR = odds ratio.

**Figure S 12.** Begg's funnel plot for publication bias under ERCC2-rs13181 polymorphism (allelic comparison B vs. A). The x-axis log (OR) and the y-axis is natural logarithm of OR. The horizontal line in the figure represents the overall estimated log (OR). The two diagonal lines indicate the pseudo 95% confidence limits of the effect estimate. Log (OR) = log-transformed OR, OR = odds ratio.

**Figure S 13.** Begg's funnel plot for publication bias under ERCC5-rs17655 polymorphism (allelic comparison B vs. A). The x-axis log (OR) and the y-axis is natural logarithm of OR. The horizontal line in the figure represents the overall estimated log (OR). The two diagonal lines indicate the pseudo 95% confidence limits of the effect estimate. Log (OR) = log-transformed OR, OR = odds ratio.

**Figure S 14.** Begg's funnel plot for publication bias under ERCC2-rs238406 polymorphism (allelic comparison B vs. A). The x-axis log (OR) and the y-axis is natural logarithm of OR. The horizontal line in the figure represents the overall estimated log (OR). The two diagonal lines indicate the pseudo 95% confidence limits of the effect estimate. Log (OR) =

log-transformed OR, OR = odds ratio.

**Figure S 15.** Linkage disequilibrium plot. The number of each cell represents  $r^2$  and white color cells shows no LD between polymorphisms. A. CHB (Han Chinese in Beijing, China); B. JPT (Japanese in Tokyo, Japan); C: CEU (Utah residents with ancestry from northern and western Europe); D: YRI (Yoruba in Ibadan, Nigeria). The “rs” numbers are SNP IDs taken from National Center for Biotechnology Information (NCBI).

**Figure S 16. Forest plots of the association between *ERCC2*-rs1799793 polymorphism and the risk of prostate cancer (B vs. A).** Each square indicates a study, and the area of squares is proportional to the weight of the study. The diamond represents the summary OR and 95% CI. CI= confidence interval, OR= odds ratio.

**Table S 1.** Methodological quality of the included studies according to the Newcastle-Ottawa Scale

| Author                | Ethnicity | Adequacy of Case Definition | Representativeness of the Cases | Selection of Controls | Definition of Controls | Comparability Cases/Controls | Ascertainment of Exposure | Same Method of Ascertainment | Non-response rate |
|-----------------------|-----------|-----------------------------|---------------------------------|-----------------------|------------------------|------------------------------|---------------------------|------------------------------|-------------------|
| <b>Rs1799793</b>      |           |                             |                                 |                       |                        |                              |                           |                              |                   |
| Rybickiet <i>al.</i>  | Caucasian | *                           | *                               | NA                    | *                      | **                           | *                         | *                            | *                 |
|                       | Mixed     | *                           | *                               | NA                    | *                      | **                           | *                         | *                            | *                 |
| Bauet <i>al.</i>      | Asian     | *                           | *                               | *                     | *                      | **                           | *                         | *                            | *                 |
| Agalliu <i>et al.</i> | Caucasian | *                           | *                               | NA                    | *                      | **                           | *                         | *                            | *                 |
|                       | African   | *                           | *                               | NA                    | *                      | **                           | *                         | *                            | *                 |
| Mandalet <i>al.</i>   | Asian     | *                           | *                               | NA                    | *                      | **                           | *                         | *                            | *                 |
| Lavenderet <i>al.</i> | Mixed     | *                           | *                               | NA                    | NA                     | **                           | *                         | *                            | *                 |
| Dhillonet <i>al.</i>  | Caucasian | *                           | *                               | NA                    | NA                     | **                           | *                         | *                            | *                 |

|                        |           |   |   |    |    |    |   |   |   |
|------------------------|-----------|---|---|----|----|----|---|---|---|
| <i>Yeohet al.</i>      | Oceania   | * | * | NA | *  | ** | * | * | * |
| <i>Mireckaet al.</i>   | Caucasian | * | * | *  | *  | ** | * | * | * |
| <i>Fachalet al.</i>    | Caucasian | * | * | NA | *  | ** | * | * | * |
| <b><i>Rs238406</i></b> |           |   |   |    |    |    |   |   |   |
| <i>Zhouet al.</i>      | Asian     | * | * | NA | *  | ** | * | * | * |
| <i>Mireckaet al.</i>   | Caucasian | * | * | *  | *  | ** | * | * | * |
| <i>Agalliuet al.</i>   | Caucasian | * | * | NA | *  | ** | * | * | * |
|                        | African   | * | * | NA | *  | ** | * | * | * |
| <b><i>Rs13181</i></b>  |           |   |   |    |    |    |   |   |   |
| <i>Rybickiet al.</i>   | Caucasian | * | * | NA | *  | ** | * | * | * |
|                        | Mixed     | * | * | NA | *  | ** | * | * | * |
| <i>Ritcheyet al.</i>   | Asian     | * | * | *  | *  | ** | * | * | * |
| <i>Bauet al.</i>       | Asian     | * | * | *  | *  | ** | * | * | * |
| <i>Agalliuet al.</i>   | Caucasian | * | * | NA | *  | ** | * | * | * |
|                        | African   | * | * | NA | *  | ** | * | * | * |
| <i>Mandalet al.</i>    | Asian     | * | * | NA | *  | ** | * | * | * |
| <i>Gaoet al.</i>       | America   | * | * | NA | NA | ** | * | * | * |
| <i>Lavenderet al.</i>  | Mixed     | * | * | NA | NA | ** | * | * | * |
| <i>Sobtiyet al.</i>    | Asian     | * | * | *  | *  | ** | * | * | * |
| <i>Mireckaet al.</i>   | Caucasian | * | * | *  | *  | ** | * | * | * |
| <b><i>Rs17655</i></b>  |           |   |   |    |    |    |   |   |   |
| Hooker                 | African   | * | * | NA | *  | ** | * | * | * |
| Berhane                | Asian     | * | * | *  | *  | ** | * | * | * |

---

Mirecka      Caucasian      \*      \*      \*      \*      \*\*      \*      \*      \*

---

This table identifies ‘high’ quality choices with a ‘star’. A study can be awarded a maximum of one star for each numbered item within the Selection and Exposure categories. A maximum of two stars can be given for Comparability.

**Table S 2.** Details of the sensitivity analyses for the polymorphisms in *ERCC2* and *ERCC5* and PCa risk.

| <b>Polymorphism</b> | <b>Comparison</b> | <b>Study Omitted</b>         | <b>Estimate</b> | <b>95%CI</b> | <b>Effect Model</b> |
|---------------------|-------------------|------------------------------|-----------------|--------------|---------------------|
| rs1799793           | B vs. A           | Rybicki <i>et al.</i> (2004) | 1.276           | 0.957-1.701  | Random              |
|                     |                   | Rybicki <i>et al.</i> (2004) | 1.279           | 0.958-1.707  |                     |
|                     |                   | Bauet <i>al.</i> (2007)      | 1.228           | 0.939-1.608  |                     |
|                     |                   | Agalliu <i>et al.</i> (2009) | 1.311           | 1.013-1.697  |                     |
|                     |                   | Agalliu <i>et al.</i> (2009) | 1.248           | 0.959-1.624  |                     |
|                     |                   | Mandalet <i>al.</i> (2010)   | 1.237           | 0.944-1.622  |                     |
|                     |                   | Lavanderet <i>al.</i> (2010) | 1.251           | 0.956-1.639  |                     |
|                     |                   | Dhillonet <i>al.</i> (2011)  | 1.290           | 0.988-1.683  |                     |
|                     |                   | Yeohet <i>al.</i> (2011)     | 1.290           | 0.988-1.683  |                     |
|                     |                   | Mirecka <i>et al.</i> (2014) | 1.140           | 0.992-1.309  |                     |



|                                 |                                 |             |             |        |
|---------------------------------|---------------------------------|-------------|-------------|--------|
| BA vs. AA                       | Fachalet <i>et al.</i> (2012)   | 1.285       | 0.987-1.672 | Random |
|                                 | Rybicki <i>et al.</i> (2004)    | 1.218       | 0.970-1.530 |        |
|                                 | Rybicki <i>et al.</i> (2004)    | 1.224       | 0.976-1.534 |        |
|                                 | Bauet <i>et al.</i> (2007)      | 1.139       | 0.924-1.405 |        |
|                                 | Agalliuet <i>et al.</i> (2009)  | 1.206       | 0.944-1.540 |        |
|                                 | Agalliuet <i>et al.</i> (2009)  | 1.181       | 0.952-1.465 |        |
|                                 | Mandalet <i>et al.</i> (2010)   | 1.217       | 0.978-1.513 |        |
|                                 | Lavenderet <i>et al.</i> (2010) | 1.187       | 0.949-1.485 |        |
|                                 | Dhillonet <i>et al.</i> (2011)  | 1.203       | 0.967-1.495 |        |
|                                 | Yeohet <i>et al.</i> (2011)     | 1.203       | 0.967-1.495 |        |
|                                 | Mireckaet <i>et al.</i> (2014)  | 1.052       | 0.948-1.167 |        |
|                                 | Fachalet <i>et al.</i> (2012)   | 1.180       | 0.952-1.462 |        |
|                                 | Rybicki <i>et al.</i> (2004)    | 1.292       | 0.966-1.728 |        |
| Rybicki <i>et al.</i> (2004)    | 1.297                           | 0.970-1.735 |             |        |
| Bauet <i>et al.</i> (2007)      | 1.219                           | 0.928-1.603 |             |        |
| Agalliuet <i>et al.</i> (2009)  | 1.306                           | 0.980-1.740 |             |        |
| Agalliuet <i>et al.</i> (2009)  | 1.256                           | 0.957-1.649 |             |        |
| Mandalet <i>et al.</i> (2010)   | 1.267                           | 0.958-1.677 |             |        |
| Lavenderet <i>et al.</i> (2010) | 1.263                           | 0.953-1.673 |             |        |
| Dhillonet <i>et al.</i> (2011)  | 1.293                           | 0.983-1.701 |             |        |
| Yeohet <i>et al.</i> (2011)     | 1.293                           | 0.983-1.701 |             |        |
| Mireckaet <i>et al.</i> (2014)  | 1.087                           | 0.970-1.218 |             |        |
| Fachalet <i>et al.</i> (2012)   | 1.271                           | 0.969-1.667 |             |        |
| Rybicki <i>et al.</i> (2004)    | 1.657                           | 0.884-3.105 | Random      |        |
| Rybicki <i>et al.</i> (2004)    | 1.660                           | 0.885-3.116 |             |        |
| Bauet <i>et al.</i> (2007)      | 1.622                           | 0.885-2.975 |             |        |

|          |                |                               |       |             |        |
|----------|----------------|-------------------------------|-------|-------------|--------|
|          |                | <i>Agalliu et al. (2009)</i>  | 1.839 | 1.107-3.055 |        |
|          |                | <i>Agalliu et al. (2009)</i>  | 1.609 | 0.912-2.838 |        |
|          |                | <i>Mandalet al. (2010)</i>    | 1.557 | 0.862-2.814 |        |
|          |                | <i>Lavender et al. (2010)</i> | 1.543 | 0.873-2.727 |        |
|          |                | <i>Dhillonet al. (2011)</i>   | 1.727 | 0.967-3.083 |        |
|          |                | <i>Yeoh et al. (2011)</i>     | 1.727 | 0.967-3.083 |        |
|          |                | <i>Mirecka et al. (2014)</i>  | 1.338 | 0.930-1.925 |        |
|          |                | <i>Fachalet al. (2012)</i>    | 1.742 | 0.984-3.084 |        |
|          | BB vs. AA + BA | <i>Rybicki et al. (2004)</i>  | 1.537 | 1.116-1.379 | Random |
|          |                | <i>Rybicki et al. (2004)</i>  | 1.538 | 1.141-1.436 |        |
|          |                | <i>Bau et al. (2007)</i>      | 1.542 | 1.037-1.327 |        |
|          |                | <i>Agalliu et al. (2009)</i>  | 1.733 | 1.111-1.366 |        |
|          |                | <i>Agalliu et al. (2009)</i>  | 1.508 | 1.133-1.401 |        |
|          |                | <i>Mandalet al. (2010)</i>    | 1.440 | 1.116-1.378 |        |
|          |                | <i>Lavender et al. (2010)</i> | 1.448 | 1.139-1.407 |        |
|          |                | <i>Dhillonet al. (2011)</i>   | 1.606 | 1.130-1.388 |        |
|          |                | <i>Yeoh et al. (2011)</i>     | 1.606 | 1.124-1.381 |        |
|          |                | <i>Mirecka et al. (2014)</i>  | 1.304 | 1.126-1.380 |        |
|          |                | <i>Fachalet al. (2012)</i>    | 1.638 | 1.102-1.360 |        |
| rs238406 | B vs. A        | <i>Zhou et al. (2013)</i>     | 1.029 | 0.940-1.127 | Fixed  |
|          |                | <i>Mirecka et al. (2014)</i>  | 1.075 | 0.967-1.195 |        |
|          |                | <i>Agalliu et al. (2009)</i>  | 1.061 | 0.918-1.229 |        |
|          |                | <i>Agalliu et al. (2009)</i>  | 0.044 | 0.955-1.143 |        |
|          | BA vs. AA      | <i>Zhou et al. (2013)</i>     | 1.051 | 0.905-1.221 | Fixed  |
|          |                | <i>Mirecka et al. (2014)</i>  | 1.137 | 0.960-1.346 |        |
|          |                | <i>Agalliu et al. (2009)</i>  | 1.009 | 0.790-1.289 |        |

|                               |                              |                              |                              |             |             |       |
|-------------------------------|------------------------------|------------------------------|------------------------------|-------------|-------------|-------|
| rs13181                       | BA + BB vs. AA               | Agalliu <i>et al.</i> (2009) | 1.076                        | 0.926-1.249 | Fixed       |       |
|                               |                              | Zhou <i>et al.</i> (2013)    | 1.054                        | 0.914-1.216 |             |       |
|                               |                              | Mirecka <i>et al.</i> (2014) | 1.140                        | 0.972-1.338 |             |       |
|                               | BB vs. AA                    | Agalliu <i>et al.</i> (2009) | 1.053                        | 0.831-1.334 | Fixed       |       |
|                               |                              | Agalliu <i>et al.</i> (2009) | 1.080                        | 0.937-1.245 |             |       |
|                               |                              | Zhou <i>et al.</i> (2013)    | 1.053                        | 0.871-1.274 |             |       |
|                               | BB vs. AA + BA               | Mirecka <i>et al.</i> (2014) | 1.139                        | 0.918-1.413 | Fixed       |       |
|                               |                              | Agalliu <i>et al.</i> (2009) | 1.151                        | 0.830-1.597 |             |       |
|                               |                              | Agalliu <i>et al.</i> (2009) | 1.087                        | 0.903-1.308 |             |       |
|                               | B vs. A                      | Zhou <i>et al.</i> (2013)    | 1.022                        | 0.870-1.201 | Fixed       |       |
|                               |                              | Mirecka <i>et al.</i> (2014) | 1.047                        | 0.869-1.262 |             |       |
|                               |                              | Agalliu <i>et al.</i> (2009) | 1.145                        | 0.874-1.500 |             |       |
|                               |                              | BA vs. AA                    | Agalliu <i>et al.</i> (2009) | 1.042       | 0.890-1.220 | Fixed |
|                               |                              |                              | Rybicki <i>et al.</i> (2004) | 1.001       | 0.934-1.073 |       |
|                               |                              |                              | Rybicki <i>et al.</i> (2004) | 1.004       | 0.936-1.076 |       |
|                               |                              |                              | Ritchey <i>et al.</i> (2005) | 1.016       | 0.951-1.084 |       |
|                               |                              |                              | Bau <i>et al.</i> (2007)     | 1.011       | 0.947-1.079 |       |
|                               |                              |                              | Agalliu <i>et al.</i> (2009) | 1.060       | 0.980-1.146 |       |
|                               |                              |                              | Agalliu <i>et al.</i> (2009) | 1.013       | 0.949-1.081 |       |
|                               |                              |                              | Mandalet <i>al.</i> (2010)   | 1.013       | 0.948-1.082 |       |
| Gao <i>et al.</i> (2010)      |                              |                              | 1.012                        | 0.947-1.082 |             |       |
| Lavender <i>et al.</i> (2010) |                              |                              | 1.011                        | 0.946-1.081 |             |       |
| Sobti <i>et al.</i> (2012)    | 1.007                        | 0.943-1.076                  |                              |             |             |       |
| BA vs. AA                     | Mirecka <i>et al.</i> (2014) | 1.016                        | 0.944-1.092                  | Fixed       |             |       |
|                               | Rybicki <i>et al.</i> (2004) | 0.961                        | 0.870-1.062                  |             |             |       |
|                               | Rybicki <i>et al.</i> (2004) | 0.966                        | 0.873-1.068                  |             |             |       |

|              |                              |       |             |       |
|--------------|------------------------------|-------|-------------|-------|
|              | Ritcheyet <i>al.</i> (2005)  | 0.965 | 0.878-1.060 |       |
|              | Bauet <i>al.</i> (2007)      | 0.958 | 0.872-1.053 |       |
|              | Agalliuet <i>al.</i> (2009)  | 0.964 | 0.862-1.077 |       |
|              | Agalliuet <i>al.</i> (2009)  | 0.961 | 0.875-1.056 |       |
|              | Mandalet <i>al.</i> (2010)   | 0.956 | 0.869-1.052 |       |
|              | Gaoet <i>al.</i> (2010)      | 0.968 | 0.880-1.065 |       |
|              | Lavanderet <i>al.</i> (2010) | 0.957 | 0.869-1.054 |       |
|              | Sobti et <i>al.</i> (2012)   | 0.958 | 0.872-1.054 |       |
|              | Mirecka <i>et al.</i> (2014) | 0.967 | 0.872-1.071 |       |
| BA+BB vs. AA | Rybickiet <i>al.</i> (2004)  | 0.978 | 0.890-1.075 | Fixed |
|              | Rybickiet <i>al.</i> (2004)  | 0.982 | 0.893-1.080 |       |
|              | Ritcheyet <i>al.</i> (2005)  | 0.988 | 0.904-1.081 |       |
|              | Bauet <i>al.</i> (2007)      | 0.982 | 0.898-1.073 |       |
|              | Agalliuet <i>al.</i> (2009)  | 1.013 | 0.911-1.126 |       |
|              | Agalliuet <i>al.</i> (2009)  | 0.984 | 0.900-1.077 |       |
|              | Mandalet <i>al.</i> (2010)   | 0.981 | 0.896-1.074 |       |
|              | Gaoet <i>al.</i> (2010)      | 0.988 | 0.903-1.082 |       |
|              | Lavanderet <i>al.</i> (2010) | 0.981 | 0.895-1.075 |       |
|              | Sobti et <i>al.</i> (2012)   | 0.980 | 0.895-1.072 |       |
|              | Mirecka <i>et al.</i> (2014) | 0.990 | 0.898-1.091 |       |
| BB vs. AA    | Rybickiet <i>al.</i> (2004)  | 1.034 | 0.888-1.204 | Fixed |
|              | Rybickiet <i>al.</i> (2004)  | 1.035 | 0.888-1.205 |       |
|              | Ritcheyet <i>al.</i> (2005)  | 1.072 | 0.929-1.238 |       |
|              | Bauet <i>al.</i> (2007)      | 1.070 | 0.927-1.236 |       |
|              | Agalliuet <i>al.</i> (2009)  | 1.226 | 1.028-1.463 |       |
|              | Agalliuet <i>al.</i> (2009)  | 1.070 | 0.926-1.237 |       |

|         |                |                                 |       |             |        |
|---------|----------------|---------------------------------|-------|-------------|--------|
|         |                | Mandalet <i>et al.</i> (2010)   | 1.076 | 0.929-1.245 |        |
|         |                | Gaoet <i>et al.</i> (2010)      | 1.063 | 0.918-1.232 |        |
|         |                | Lavanderet <i>et al.</i> (2010) | 1.070 | 0.924-1.240 |        |
|         |                | Sobtiet <i>et al.</i> (2012)    | 1.057 | 0.913-1.223 |        |
|         |                | Mirecka <i>et al.</i> (2014)    | 1.084 | 0.919-1.279 |        |
|         | BB vs. BA + AA | Rybickiet <i>et al.</i> (2004)  | 1.057 | 0.917-1.218 | Fixed  |
|         |                | Rybickiet <i>et al.</i> (2004)  | 1.057 | 0.917-1.218 |        |
|         |                | Ritcheyet <i>et al.</i> (2005)  | 1.095 | 0.958-1.252 |        |
|         |                | Bauet <i>et al.</i> (2007)      | 1.094 | 0.956-1.250 |        |
|         |                | Agalliuet <i>et al.</i> (2009)  | 1.250 | 1.061-1.473 |        |
|         |                | Agalliuet <i>et al.</i> (2009)  | 1.093 | 0.956-1.251 |        |
|         |                | Mandalet <i>et al.</i> (2010)   | 1.101 | 0.961-1.261 |        |
|         |                | Gaoet <i>et al.</i> (2010)      | 1.082 | 0.943-1.240 |        |
|         |                | Lavanderet <i>et al.</i> (2010) | 1.094 | 0.955-1.254 |        |
|         |                | Sobtiet <i>et al.</i> (2012)    | 1.081 | 0.944-1.239 |        |
|         |                | Mirecka <i>et al.</i> (2014)    | 1.102 | 0.943-1.288 |        |
| rs17655 | B vs. A        | Hookeret <i>et al.</i> (2008)   | 1.234 | 1.049-1.452 | Random |
|         |                | Berhaneet <i>et al.</i> (2011)  | 1.19  | 1.034-1.385 |        |
|         |                | Mireckaet <i>et al.</i> (2014)  | 1.226 | 1.009-1.489 |        |
|         | BA vs. AA      | Hookeret <i>et al.</i> (2008)   | 1.200 | 0.976-1.476 | Fixed  |
|         |                | Berhaneet <i>et al.</i> (2011)  | 1.203 | 0.988-1.466 |        |
|         |                | Mireckaet <i>et al.</i> (2014)  | 1.121 | 0.830-1.515 |        |
|         | BA + BB vs. AA | Hookeret <i>et al.</i> (2008)   | 1.244 | 1.020-1.516 | Fixed  |
|         |                | Berhaneet <i>et al.</i> (2011)  | 1.234 | 1.023-1.489 |        |
|         |                | Mireckaet <i>et al.</i> (2014)  | 1.224 | 0.921-1.626 |        |
|         | BB vs. AA      | Hookeret <i>et al.</i> (2008)   | 1.613 | 1.044-2.493 | Fixed  |

|                |                             |       |             |       |
|----------------|-----------------------------|-------|-------------|-------|
|                | Berhaneet <i>al.</i> (2011) | 1.369 | 0.970-1.932 |       |
|                | Mireckaet <i>al.</i> (2014) | 1.587 | 1.056-2.385 |       |
| BB vs. BA + AA | Hookeret <i>al.</i> (2008)  | 1.535 | 1.002-2.349 | Fixed |
|                | Berhaneet <i>al.</i> (2011) | 1.272 | 0.928-1.744 |       |
|                | Mireckaet <i>al.</i> (2014) | 1.449 | 1.012-2.075 |       |

B: mutated allele; A: wild allele.

**Table S 3.** *P* values of the Egger's test for the polymorphisms in *ERCCs*.

| Polymorphism | Subgroup  | N  | Egger's test $P >  t $ | Trim and Fill Method |
|--------------|-----------|----|------------------------|----------------------|
| rs1799793    | Overall   | 11 | 0.639                  | -                    |
|              | Asian     | 2  | -                      | -                    |
|              | Caucasian | 5  | 0.843                  | -                    |
|              | Other     | 4  | 0.531                  | -                    |
|              | H-B       | 5  | <b>0.036</b>           | Bias Not Existed     |
|              | P-B       | 4  | 0.622                  | -                    |
|              | Other     | 2  | -                      | -                    |
|              | N         | 3  | <b>0.001</b>           | Bias Existed         |
|              | Y         | 8  | 0.791                  | -                    |
| rs238406     | Overall   | 4  | 0.202                  | -                    |
| rs13181      | Overall   | 11 | 0.095                  | -                    |
|              | Asian     | 4  | 0.975                  | -                    |

|         |           |   |       |   |
|---------|-----------|---|-------|---|
|         | Caucasian | 4 | 0.304 | - |
|         | Other     | 3 | 0.462 | - |
|         | H-B       | 3 | 0.128 | - |
|         | P-B       | 6 | 0.275 | - |
|         | Other     | 2 | -     | - |
|         | N         | 3 | 0.174 | - |
|         | Y         | 8 | 0.116 | - |
| rs17655 | Overall   | 3 | 0.460 | - |

H-B: hospital-based; P-B: population-based; Y: study conformed to HWE; N: study did not conform to HWE; N: number of studies.

**Table S 4.** Details of LD analysis for polymorphisms in *ERCC2*.

| <b>L1</b>  | <b>L2</b> | <b>D'</b> | <b>LOD</b> | <b>r<sup>2</sup></b> | <b>CI<sub>low</sub></b> | <b>CI<sub>hi</sub></b> |
|------------|-----------|-----------|------------|----------------------|-------------------------|------------------------|
| <b>JPT</b> |           |           |            |                      |                         |                        |
| rs13181    | rs1799793 | 0.605     | 5.77       | 0.34                 | 0.38                    | 0.77                   |
| rs13181    | rs238406  | 1         | 2.32       | 0.066                | 0.42                    | 1                      |
| rs1799793  | rs238406  | 1         | 2.33       | 0.071                | 0.42                    | 1                      |
| <b>CHB</b> |           |           |            |                      |                         |                        |
| rs13181    | rs1799793 | 0.837     | 17.21      | 0.503                | 0.69                    | 0.93                   |
| rs13181    | rs238406  | 0.517     | 1.22       | 0.026                | 0.15                    | 0.75                   |
| rs1799793  | rs238406  | 1         | 4.77       | 0.07                 | 0.67                    | 1                      |
| <b>CEU</b> |           |           |            |                      |                         |                        |
| rs13181    | rs1799793 | 0.787     | 17.73      | 0.619                | 0.68                    | 0.86                   |
| rs13181    | rs238406  | 0.836     | 8.28       | 0.331                | 0.65                    | 0.93                   |
| rs1799793  | rs238406  | 1         | 14.74      | 0.473                | 0.89                    | 1                      |
| <b>YRI</b> |           |           |            |                      |                         |                        |

---

|         |           |       |      |      |      |      |
|---------|-----------|-------|------|------|------|------|
| rs13181 | rs1799793 | 0.579 | 2.54 | 0.13 | 0.28 | 0.78 |
|---------|-----------|-------|------|------|------|------|

---

CIlow: Low confident interval; CIhi: High confident interval.



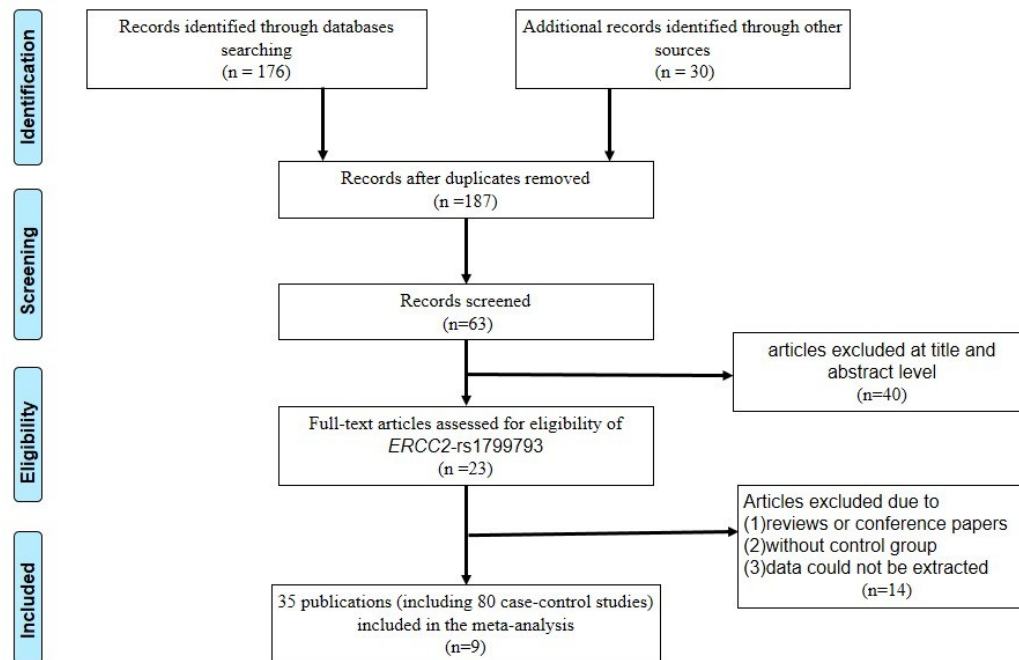

**Figure S 1. Flow chart of studies selection process for polymorphisms in *ERCC2*-rs1799793 genes.**

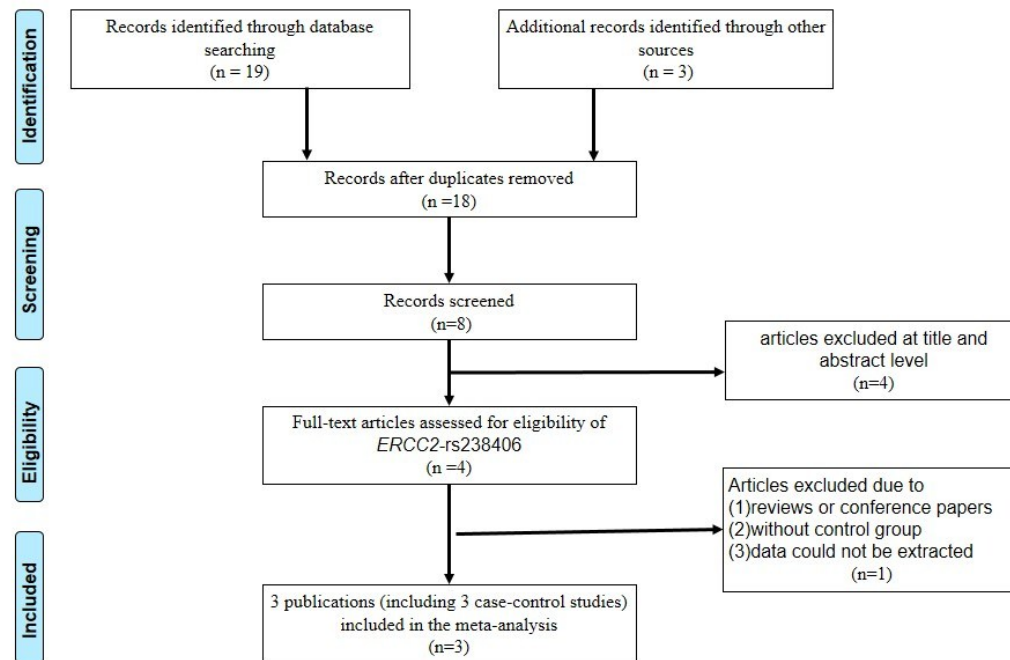

**Figure S 2. Flow chart of studies selection process for polymorphisms in *ERCC2-rs238406* genes.**

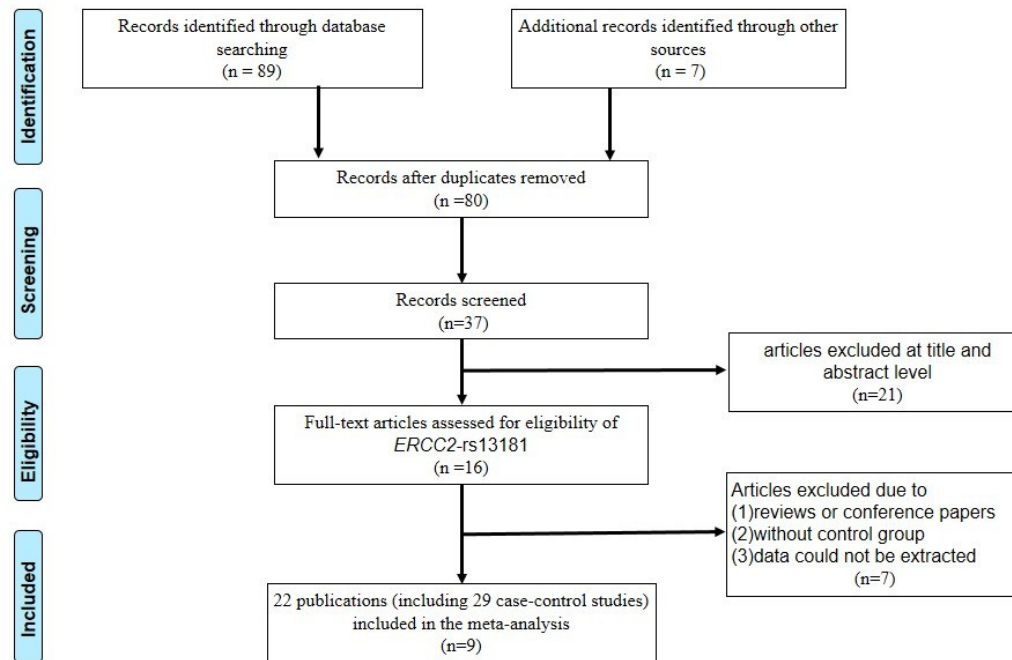

**Figure S 3. Flow chart of studies selection process for polymorphisms in *ERCC2*-rs13181 genes.**

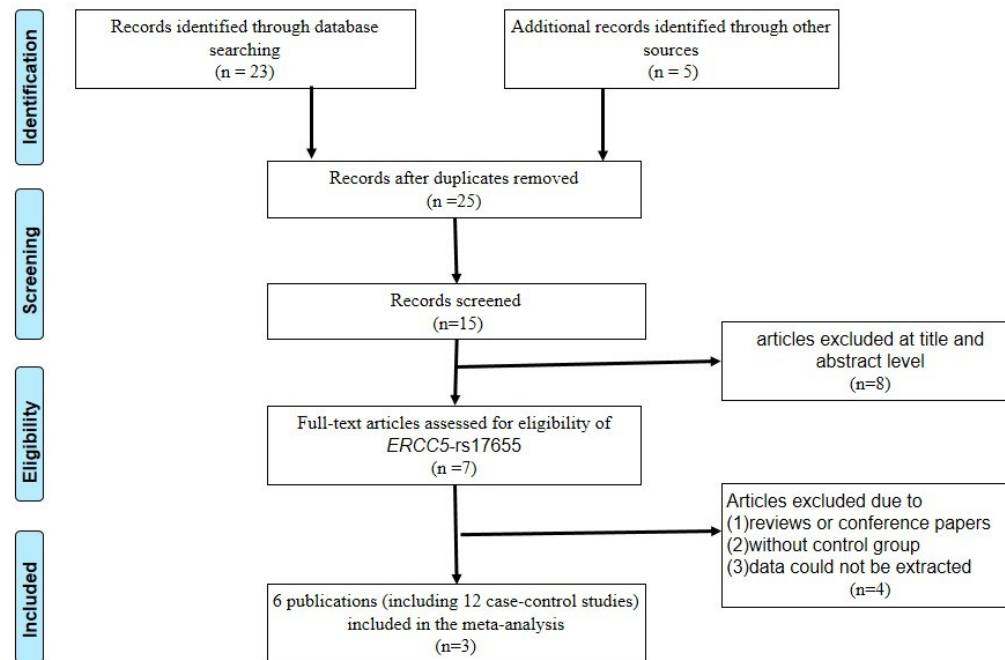

**Figure S 4. Flow chart of studies selection process for polymorphisms in *ERCC5*-rs17655**

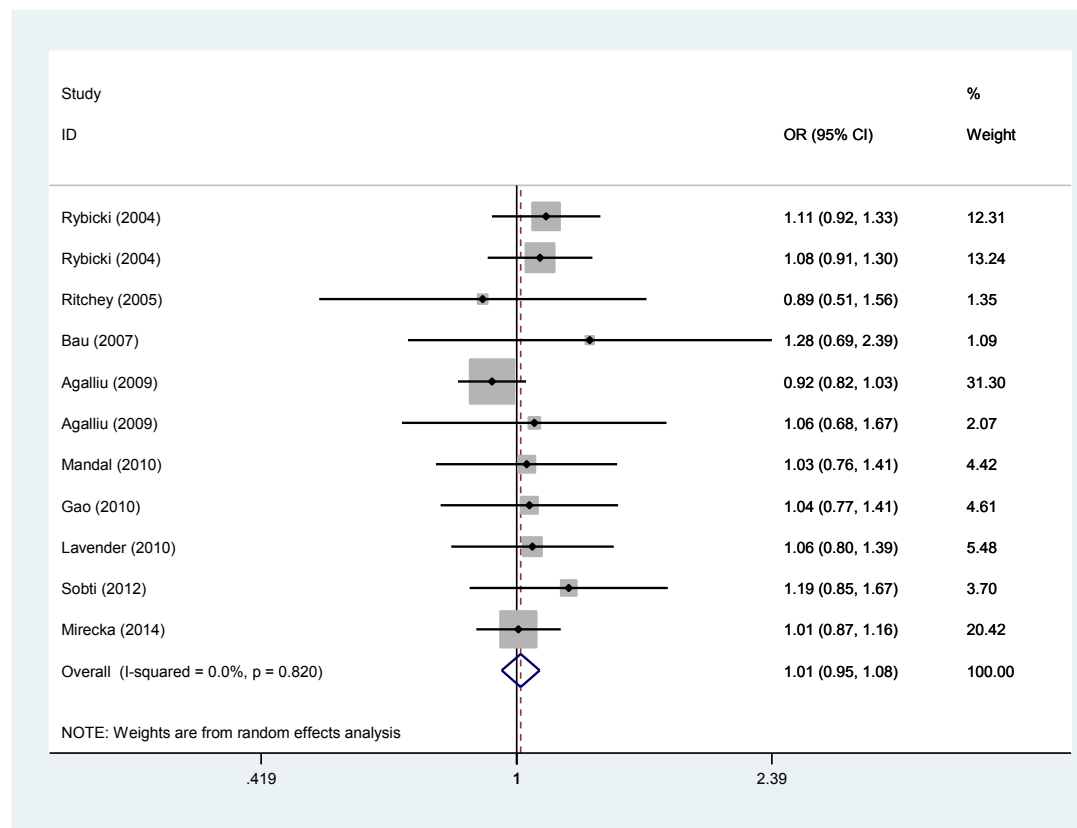

**Figure S 5. Forest plots of the association between *ERCC2*-rs13181 polymorphism and the risk of prostate cancer (B vs. A).** Each square indicates a study, and the area of squares is proportional to the weight of the study. The diamond

represents the summary OR and 95% CI. CI= confidence interval, OR= odds ratio.

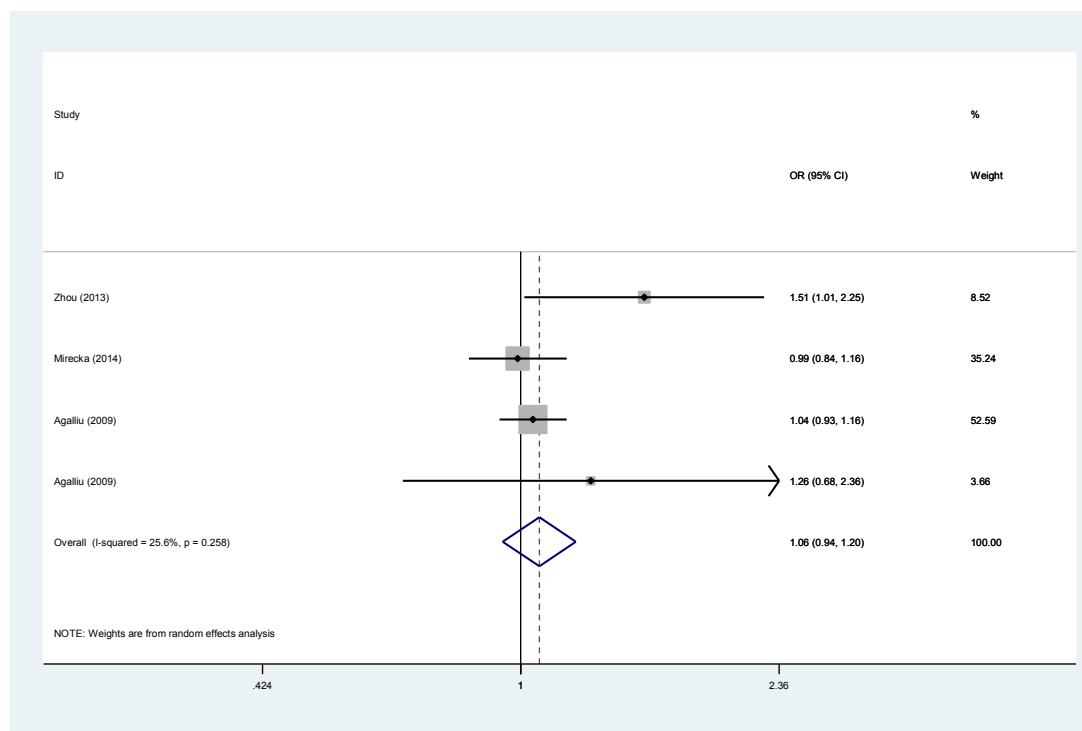

**Figure S 6. Forest plots of the association between *ERCC2*-rs238406 polymorphism and the risk of prostate cancer (B vs. A).** Each square indicates a study, and the area of squares is proportional to the weight of the study. The diamond

represents the summary OR and 95% CI. CI= confidence interval, OR= odds ratio.

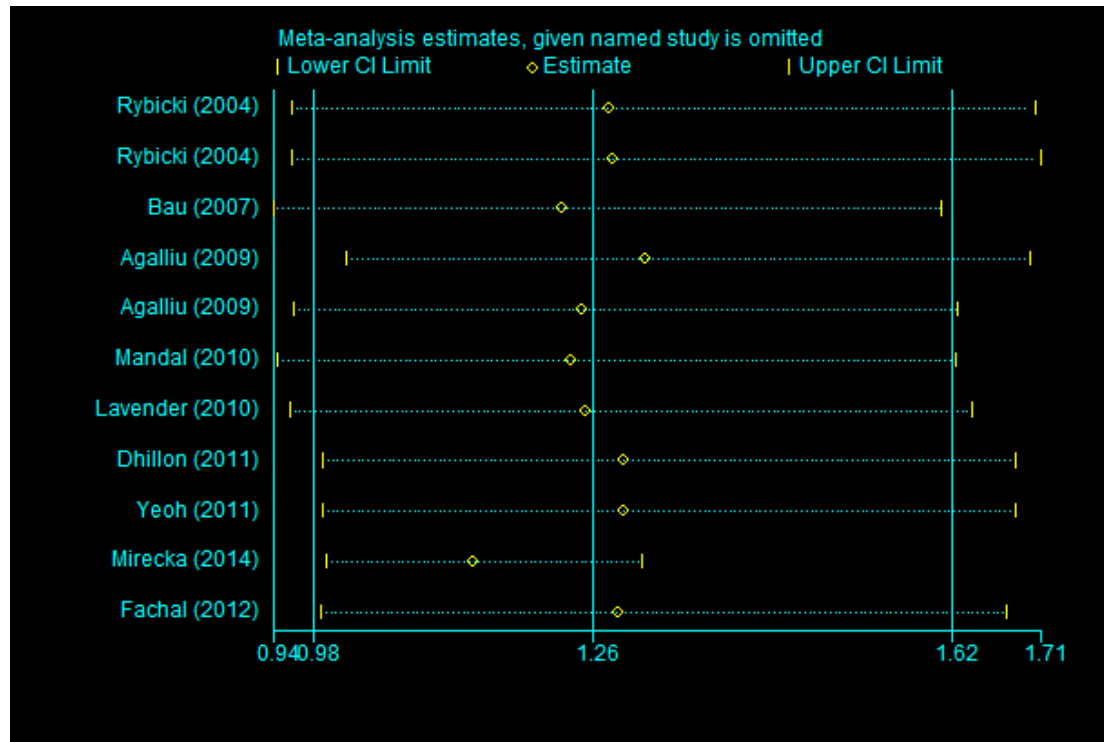

**Figure S 7. Sensitivity analysis for *ERCC2*-rs1799793 polymorphism and the risk of prostate cancer (allelic comparison B vs. A).**

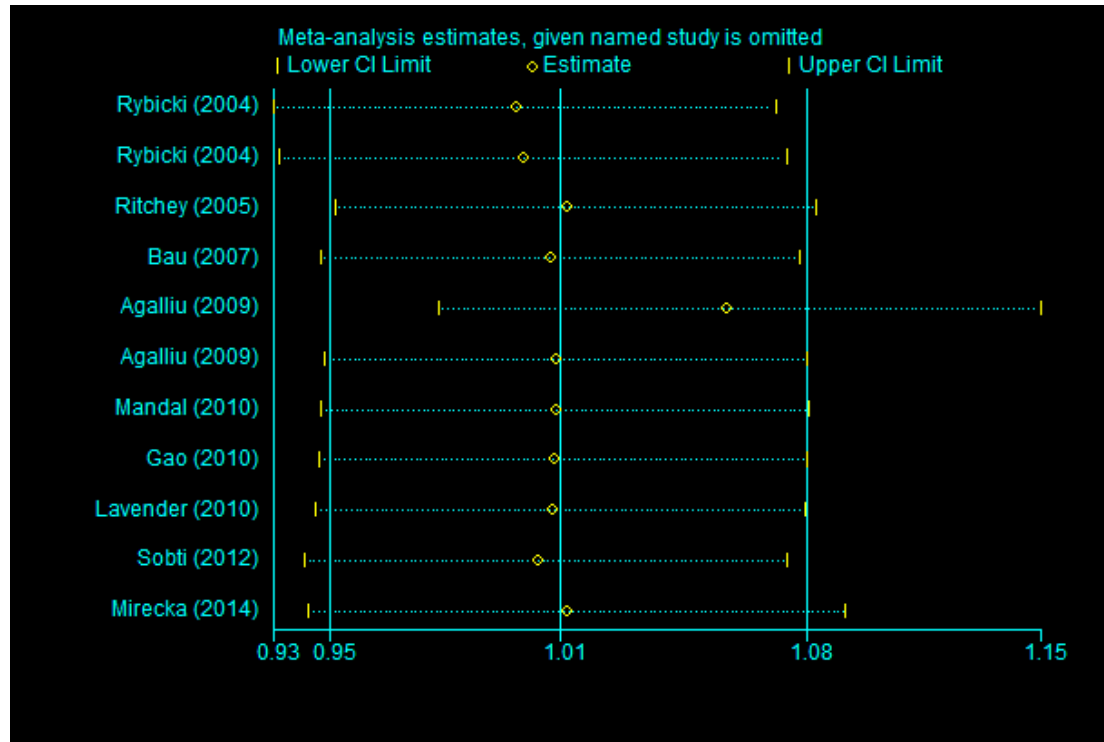

Figure S 8. Sensitivity analysis for *ERCC2*-rs13181 polymorphism and the risk of prostate cancer (allelic comparison B vs. A).



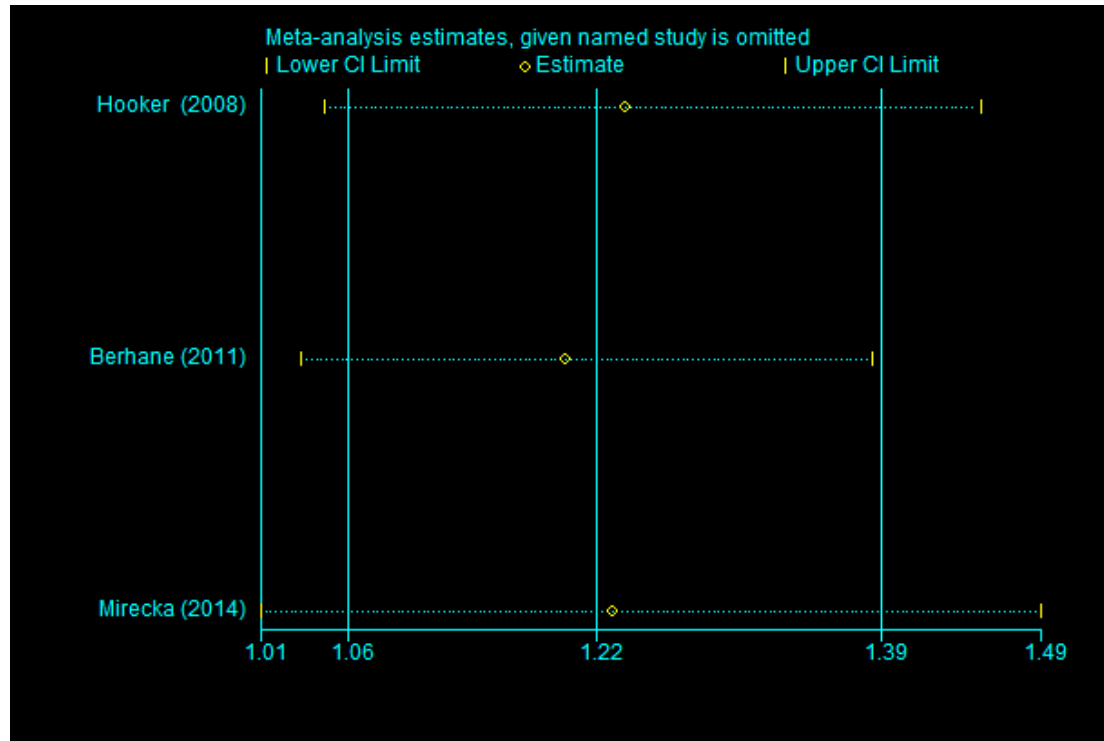

**Figure S 9. Sensitivity analysis for *ERCC5*-rs17655 polymorphism and the risk of prostate cancer (allelic comparison B vs. A).**

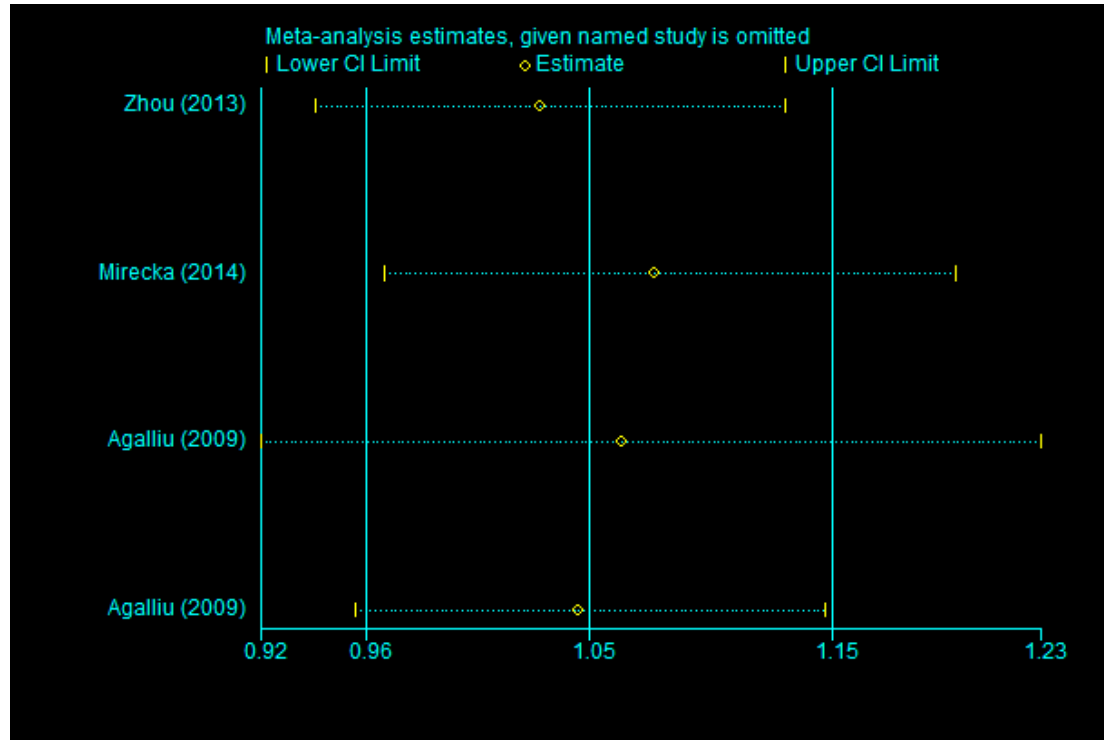

**Figure S 10. Sensitivity analysis for *ERCC2* rs238406 polymorphism and the risk of prostate cancer (allelic comparison B vs. A).**

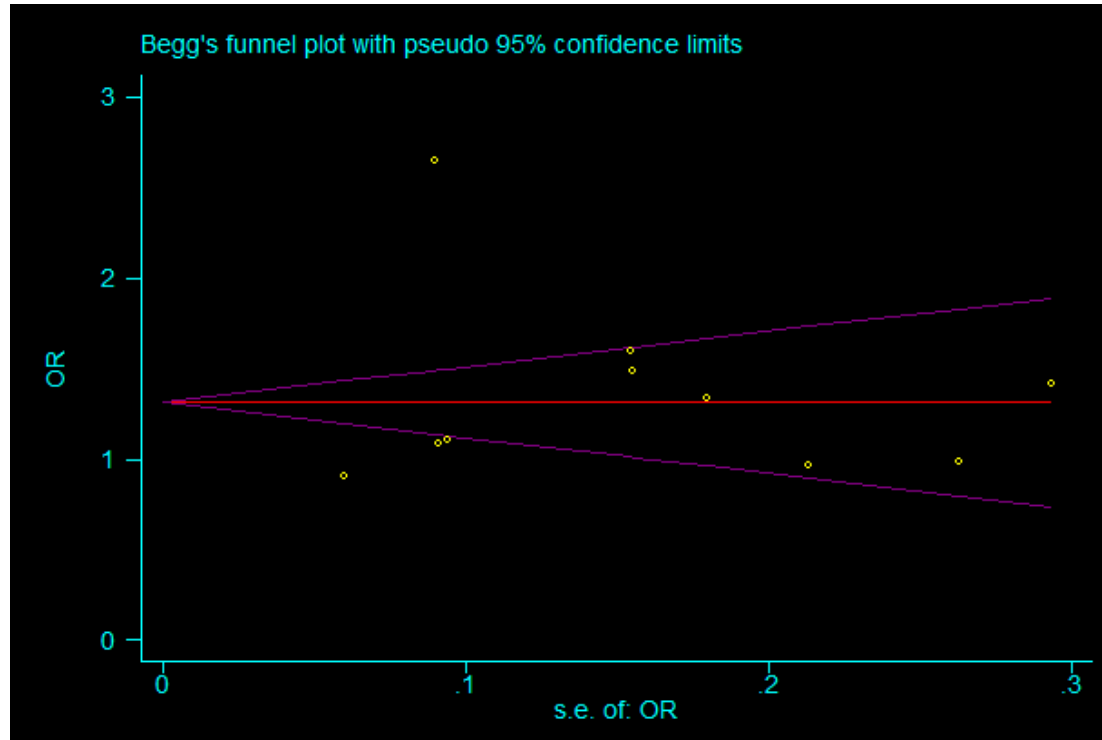

**Figure S 11. Begg's funnel plot for publication bias under *ERCC2*-rs1799793 polymorphism (allelic comparison B vs. A).** The x-axis log (OR) and the y-axis is natural logarithm of OR. The horizontal line in the figure represents the overall estimated log (OR). The two diagonal lines indicate the pseudo 95% confidence limits of the effect estimate. Log (OR) = log-transformed OR, OR = odds ratio.

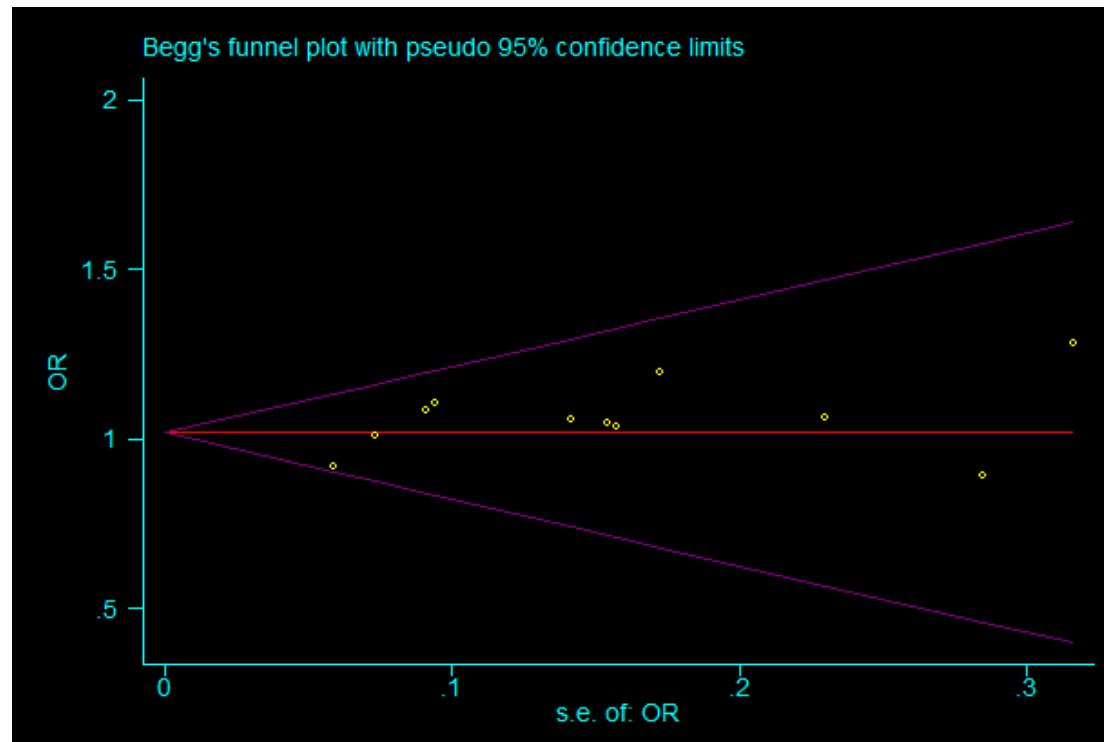

**Figure S 12. Begg's funnel plot for publication bias under *ERCC2*-rs13181 polymorphism (allelic comparison B vs. A).** The x-axis log (OR) and the y-axis is natural logarithm of OR. The horizontal line in the figure represents the overall estimated log (OR). The two diagonal lines indicate the pseudo 95% confidence limits of the effect estimate. Log (OR) = log-transformed OR, OR = odds ratio.

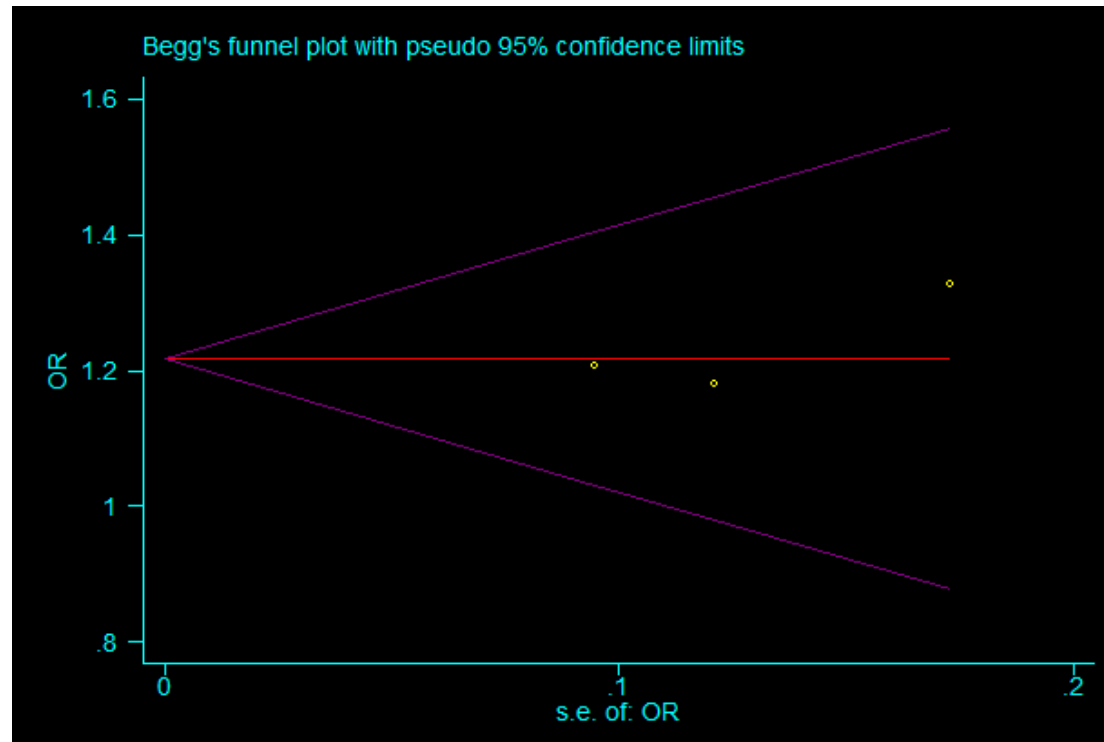

**Figure S 13. Begg's funnel plot for publication bias under *ERCC5*-rs17655 polymorphism (allelic comparison B vs. A).** The x-axis log (OR) and the y-axis is natural logarithm of OR. The horizontal line in the figure represents the overall estimated log (OR). The two diagonal lines indicate the pseudo 95% confidence limits of the effect estimate. Log (OR) = log-transformed OR, OR = odds ratio.

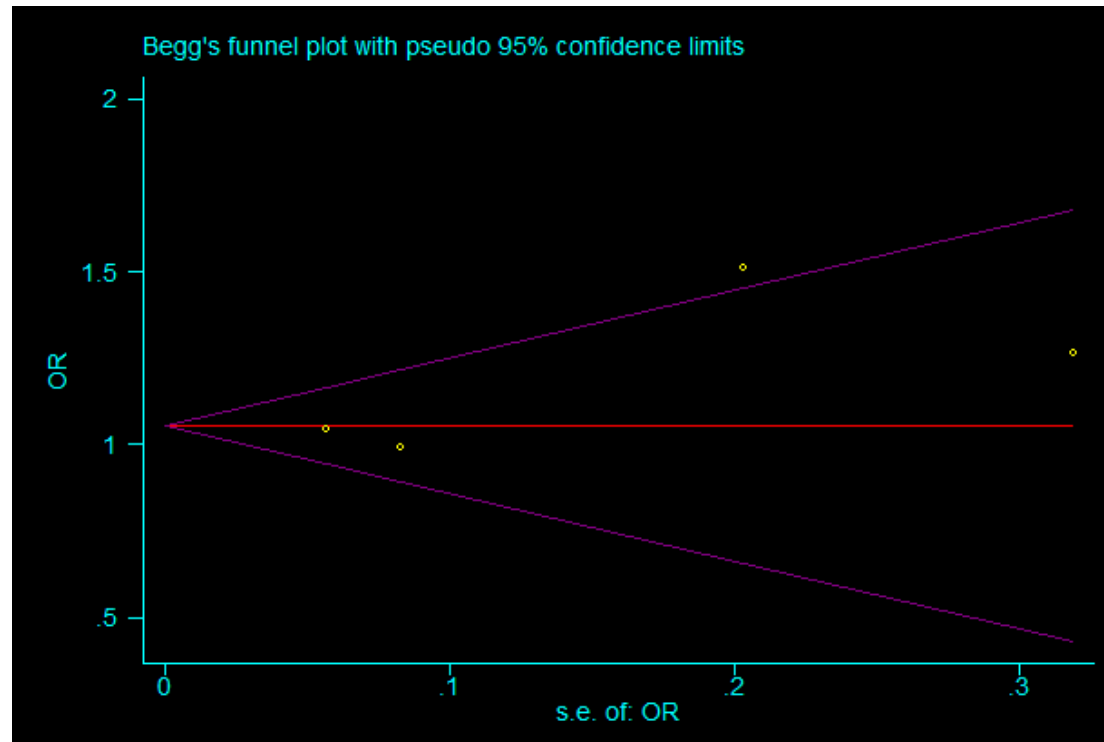

**Figure S 14. Begg's funnel plot for publication bias under *ERCC2*-rs238406 polymorphism (allelic comparison B vs. A).** The x-axis log (OR) and the y-axis is natural logarithm of OR. The horizontal line in the figure represents the overall estimated log (OR). The two diagonal lines indicate the pseudo 95% confidence limits of the effect estimate. Log (OR) = log-transformed OR, OR = odds ratio.

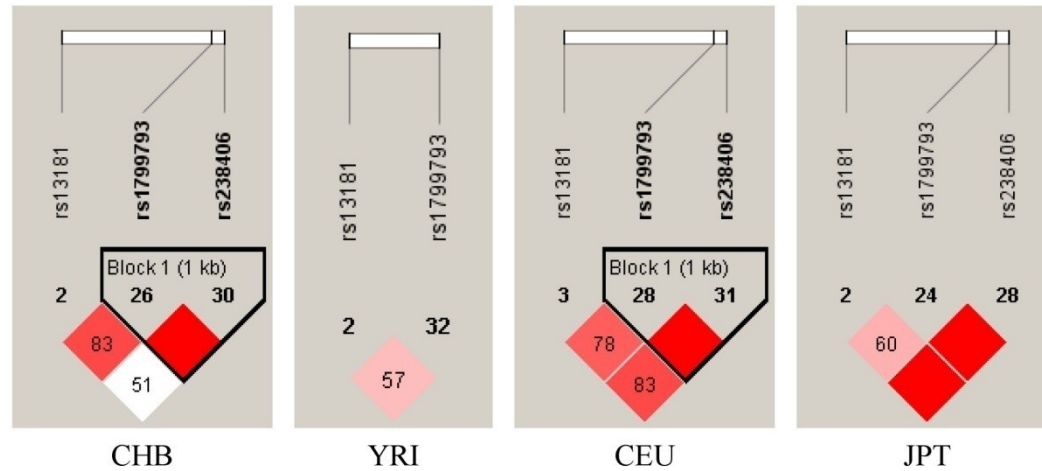

**Figure S 15. Linkage disequilibrium plot.** The number of each cell represents  $r^2$  and white color cells shows no LD between polymorphisms. A. CHB (Han Chinese in Beijing, China); B. JPT (Japanese in Tokyo, Japan); C: CEU (Utah residents with ancestry from northern and western Europe); D: YRI (Yoruba in Ibadan, Nigeria). The “rs” numbers are SNP IDs taken from National Center for Biotechnology Information (NCBI).

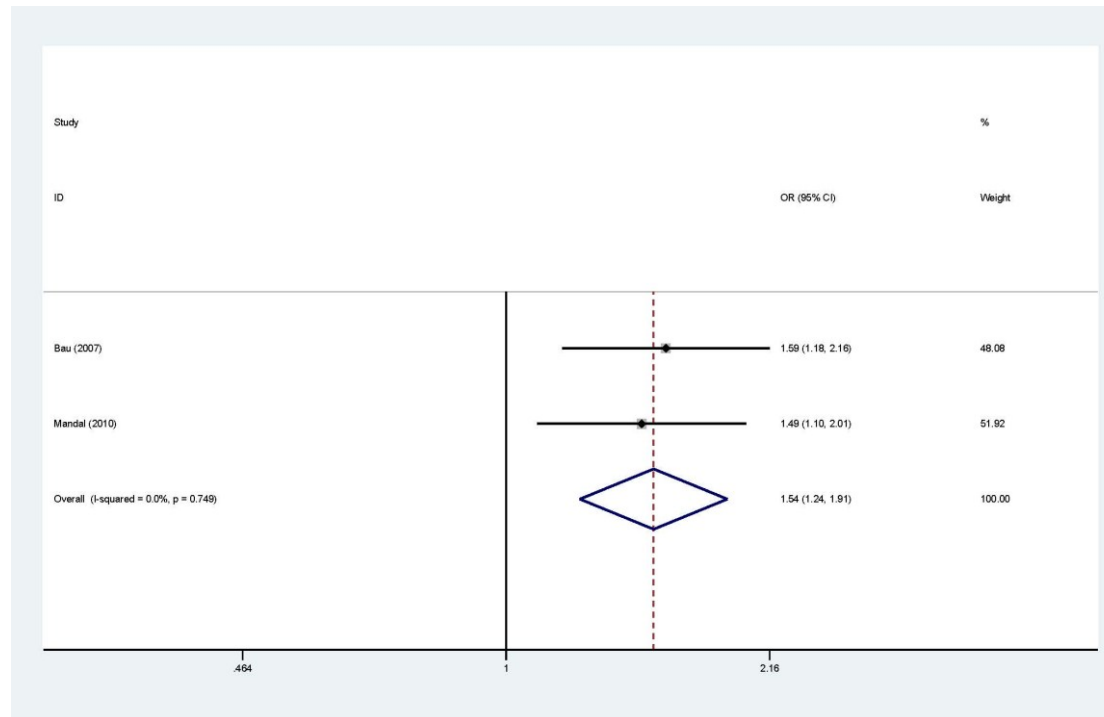

**Figure S 16. Forest plots of the association between *ERCC2*-rs1799793 polymorphism and the risk of prostate cancer (B vs. A).** Each square indicates a study, and the area of squares is proportional to the weight of the study. The diamond represents the summary OR and 95% CI. CI= confidence interval, OR= odds ratio.
